# Supplementary material
Source: PubMed Central journal article supplement (PMC2997137)

## Supplementary Information

### Figure Legends

**Figure S1. CAGGCreER<sup>TM</sup> induces deletion in nearly all neck and zymogenic cells.** **A**, LacZ staining after 0.75 mg of tamoxifen per 20 g mouse body weight was injected intraperitoneally into CAGGCreER<sup>TM</sup>;R26R mice for seven days. Around 50% of all cells were LacZ positive; however, almost all neck cells (yellow arrowhead in (middle panel)) and all ZCs (black arrowhead in (right panel)) were LacZ positive. **B**, *Xbp1* qRT-PCR with primers specific for the loxP-flanked exon2. *Xbp1<sup>d</sup>* stomach shows 5.2 fold less exon2 containing transcripts from control.

**Figure S2. CAGGCreER<sup>TM</sup>;Xbp1<sup>lox/lox</sup> mice do not have defects in surface pit cell, parietal cell, and enteroendocrine cell lineages.** **A**, Immunofluorescent staining for AAA (surface pit cell marker, magenta) and Hoechst 33258 (nucleus, blue). There was no significant difference in the number of AAA positive cells between CAGGCreER<sup>TM</sup>; *Xbp1<sup>lox/+</sup>* control (left panel) and CAGGCreER<sup>TM</sup>; *Xbp1<sup>lox/lox</sup>* (right panel) stomachs 14 days after tamoxifen injection. **B**, Immunofluorescent staining for H<sup>+</sup>/K<sup>+</sup> ATPase (parietal cell marker, green) and Hoechst 33258 (nucleus, blue). There was no significant difference in the number of H<sup>+</sup>/K<sup>+</sup> ATPase positive cells (green) between CAGGCreER<sup>TM</sup>; *Xbp1<sup>lox/+</sup>* control (left panel) and CAGGCreER<sup>TM</sup>; *Xbp1<sup>lox/lox</sup>* (right panel) stomachs 14 days after tamoxifen injection. **C**, Immunohistochemistry for Chromogranin A (enteroendocrine cell marker, brown). There was no significant difference in the number of Chromogranin A positive cells (e.g., arrowhead) between CAGGCreER<sup>TM</sup>; *Xbp1<sup>lox/+</sup>* control (left panel) and CAGGCreER<sup>TM</sup>; *Xbp1<sup>lox/lox</sup>* (right panel) stomachs 14 days after tamoxifen injection.

**Figure S3. Proliferation and apoptosis are not substantially affected by *Xbp1* deletion. A,** Immunofluorescent staining for Brdu (red), GSII (Neck cell marker, green), and Hoechst 33258 (nucleus, blue). There was no significant difference in the number of Brdu positive cells (yellow arrow head) between wildtype control (left panel) and CAGGCreER<sup>TM</sup>; *Xbp1*<sup>fllox/fllox</sup> (right panel) stomachs 14 days after tamoxifen injection.

**B,** Fluorescent staining for TUNEL (green), GSII (Neck cell marker, red), and Hoechst 33258 (nucleus, blue). There was no significant difference in the number of TUNEL positive cells (yellow arrow head) between wildtype control (left panel) and CAGGCreER<sup>TM</sup>; *Xbp1*<sup>fllox/fllox</sup> (right panel) stomachs 14 days after tamoxifen injection.

**Figure S4. *Xbp1* germline null mouse vs. control at 3 weeks old (A) and their corresponding stomachs (B).**

**Table S1. Primer sequences**

| <b>Primer</b>                                                                | <b>5'- Sequence – 3'</b>                                         | <b>Reference</b> |
|------------------------------------------------------------------------------|------------------------------------------------------------------|------------------|
| Xbp205 forward<br>Xbp272 reverse                                             | CCT GAG CCC GGA GGA GAA<br>CTC GAG CAG TCT GCG CTG               | <sup>1</sup>     |
| Mist1 forward<br>Mist1 reverse                                               | GCT GAC CGC CAC CAT ACT TAC<br>TGT GTA GAG TAG CGT TGC AGG       | PrimerBank*      |
| Tff1 forward<br>Tff1 reverse                                                 | AGC ACA AGG TGA TCT GTG TCC<br>GGA AGC CAC AAT TTA TCC TCT CC    | PrimerBank       |
| H/K ATPase, $\alpha$ subunit forward<br>H/K ATPase, $\alpha$ subunit reverse | TCT GCT TTG CGG GAC TTG TA<br>CGG CAT TTG AGC ACA GCA T          | This study       |
| Tff2 forward<br>Tff2 reverse                                                 | TGC TCT GGT AGA GGG CGA G<br>CGA CGC TAG AGT CAA AGC AG          | PrimerBank       |
| Gkn3 forward<br>Gkn3 reverse                                                 | CCG TTG CAT TCG CTG GAG A<br>AAC TGT CGC TAG TGT TCG TCA         | PrimerBank       |
| Pgc forward<br>Pgc reverse                                                   | ATG AAG AGT ATC CGG GAG ACC<br>TGG GCT CAT AGA GTA CAC TGT AG    | PrimerBank       |
| GIF forward<br>GIF reverse                                                   | CCC TCT ACC TCC TAA GTG TTC TC<br>CTG AGT CAG TCA CCG AGT TCT    | PrimerBank       |
| Edem1 forward<br>Edem1 reverse                                               | AGT CAA ATG TGG ATA TGC TAC GC<br>ACA GAT ATG ATA TGG CCC TCA GT | PrimerBank       |
| Dnajb9 forward<br>Dnajb9 reverse                                             | CTC CAC AGT CAG TTT TCG TCT T<br>GGC CTT TTT GAT TTG TCG CTC     | PrimerBank       |
| Sec61a1 forward<br>Sec61a1 reverse                                           | GGA AGT CAT CAA GCC ATT CTG T<br>GCA TCC AGT AGA ACG GGT CAG     | PrimerBank       |
| Hspa5 forward<br>Hspa5 reverse                                               | ACT TGG GGA CCA CCT ATT CCT<br>ATC GCC AAT CAG ACG CTC C         | PrimerBank       |
| CHOP forward<br>CHOP reverse                                                 | CTG GAA GCC TGG TAT GAG GAT<br>CAG GGT CAA GAG TAG TGA AGG T     | PrimerBank       |
| hXbp1(s) forward<br>hXbp1(s) reverse                                         | TCT GCT GAG TCC GCA GCA GG<br>CTG GCA GGC TCT GGG GAA G          | This study       |
| hMist1 forward<br>hMist1 reverse                                             | CGG ATG CAC AAG CTA AAT AAC G<br>CCG TCA GCG ATT TGA TGT AGT TC  | PrimerBank       |
| Mist1 promoter forward for ChIP<br>Mist1 promoter reverse for ChIP           | ATG GTG GCT TCC ACT CAG AC<br>GGC AGC ACC CTT TAA ACA TC         | This study       |
| Intron 4 of Bmpr1a forward for ChIP<br>Intron 4 of Bmpr1a reverse for ChIP   | GCA GCT GCT GCT GCA GCC TCC<br>TGG CTA CAA TTT GTC TCA TGC       | This study       |

\* <http://pga.mgh.harvard.edu/primerbank/>

## Supplementary References

- S1. Kaser A, Lee AH, Franke A, Glickman JN, Zeissig S, Tilg H, Nieuwenhuis EE, Higgins DE, Schreiber S, Glimcher LH, Blumberg RS. XBP1 links ER stress to intestinal inflammation and confers genetic risk for human inflammatory bowel disease. *Cell* 2008;134:743-56.

**A** CAGGCreER<sup>TM</sup>; R26R

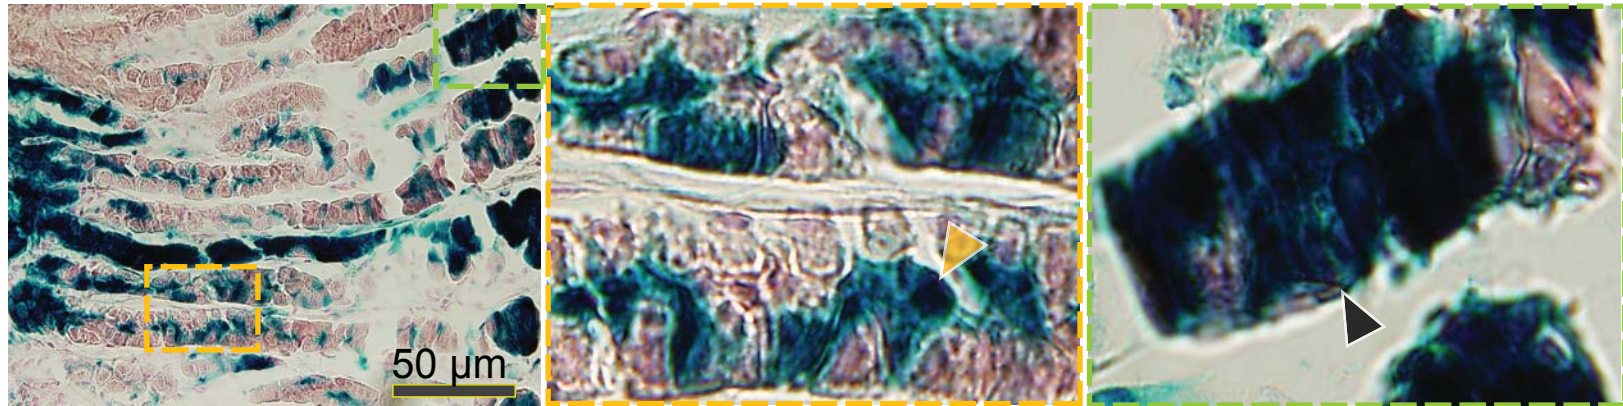

**B**

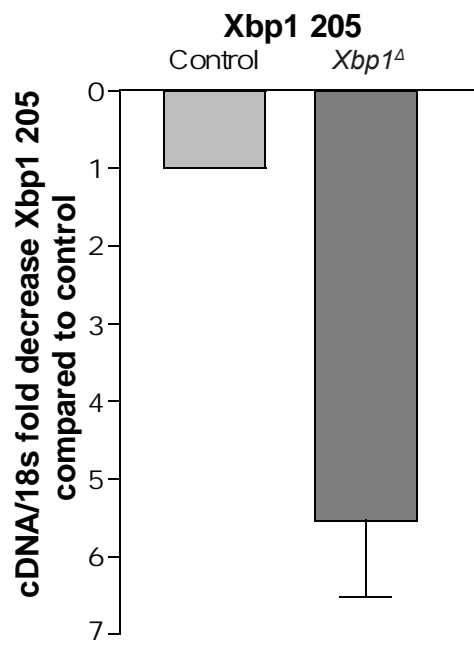



A *Xbp1<sup>Δ/+</sup>* 14d 7Mo*Xbp1<sup>Δ</sup>* 14d 7Mo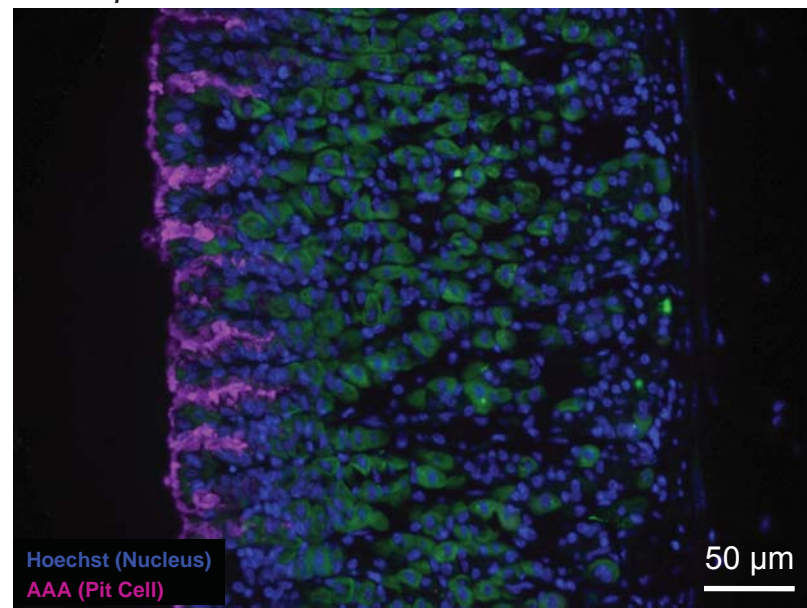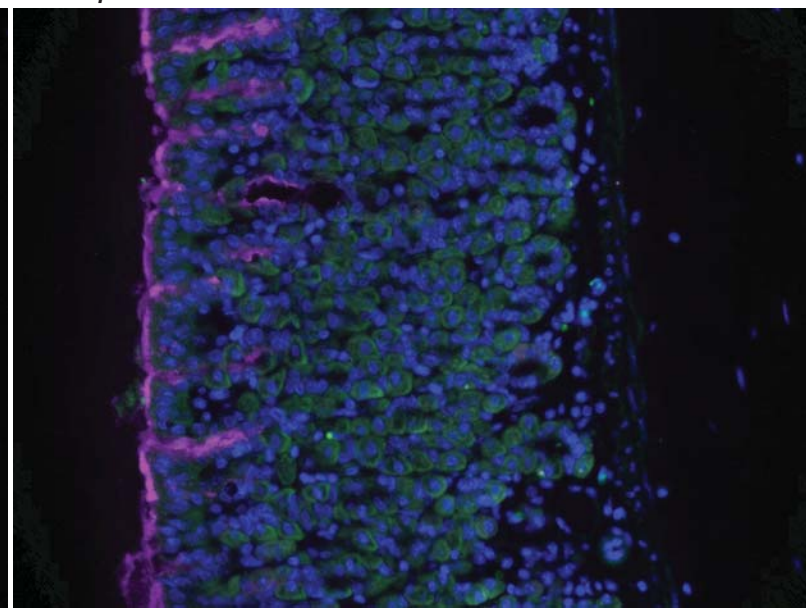B *Xbp1<sup>Δ/+</sup>* 14d 7Mo*Xbp1<sup>Δ</sup>* 14d 7Mo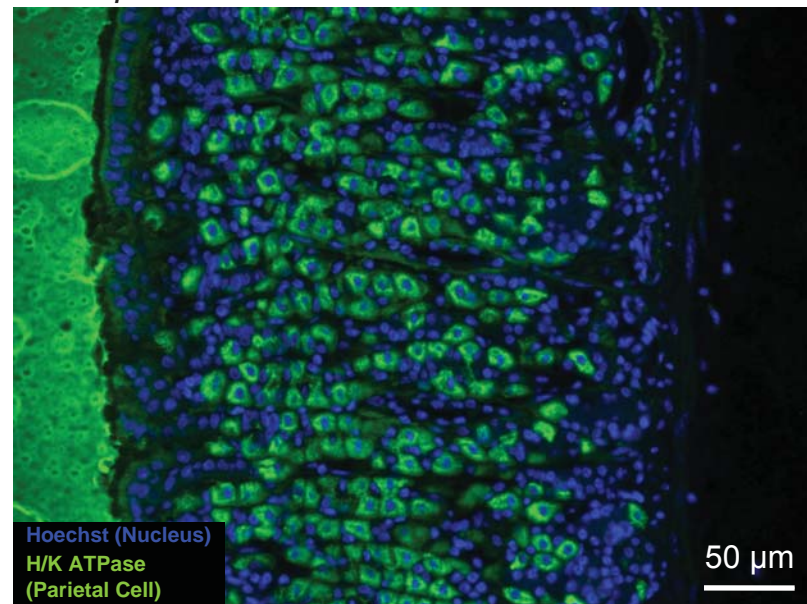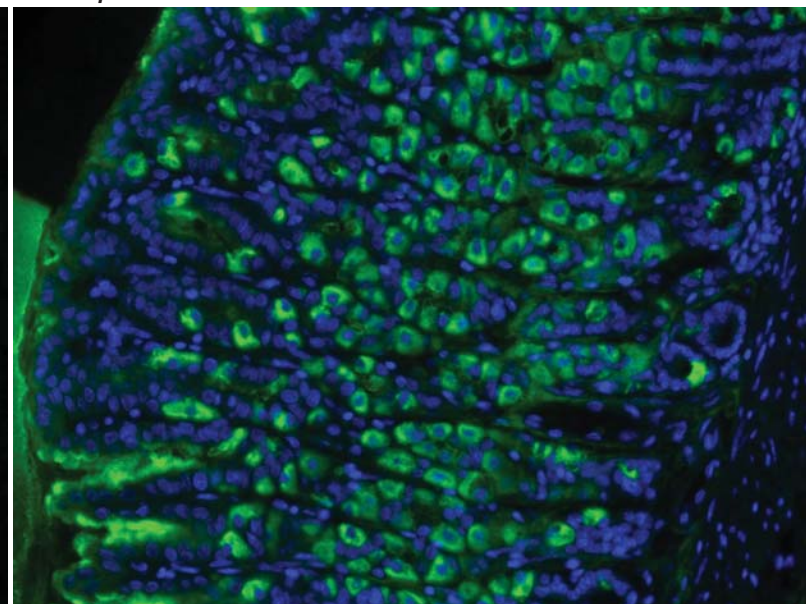C *Xbp1<sup>Δ/+</sup>* 14d 5Mo*Xbp1<sup>Δ</sup>* 14d 7Mo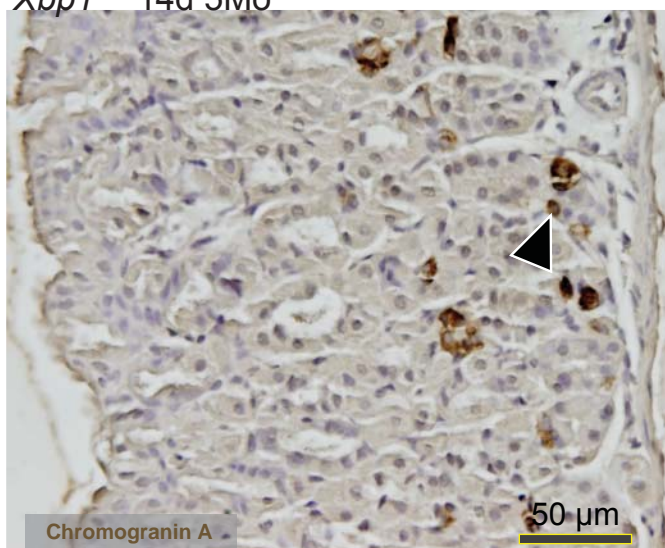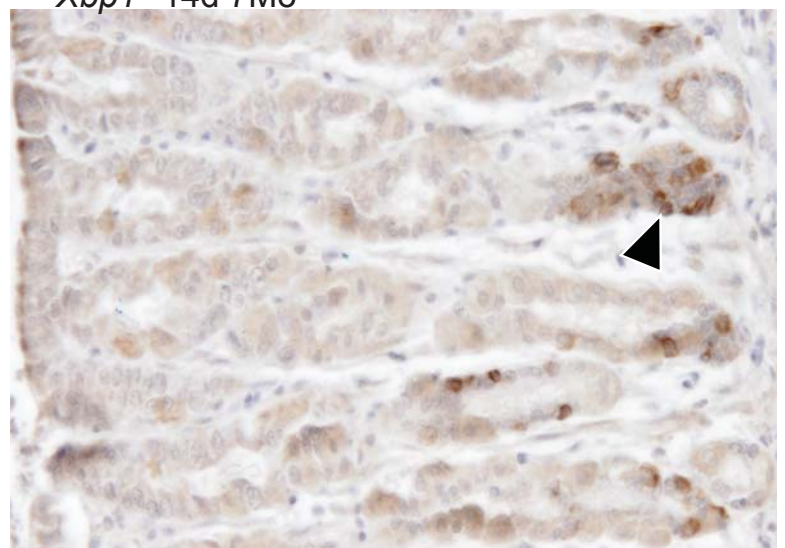



A WT

*Xbp1<sup>Δ</sup>* 14d

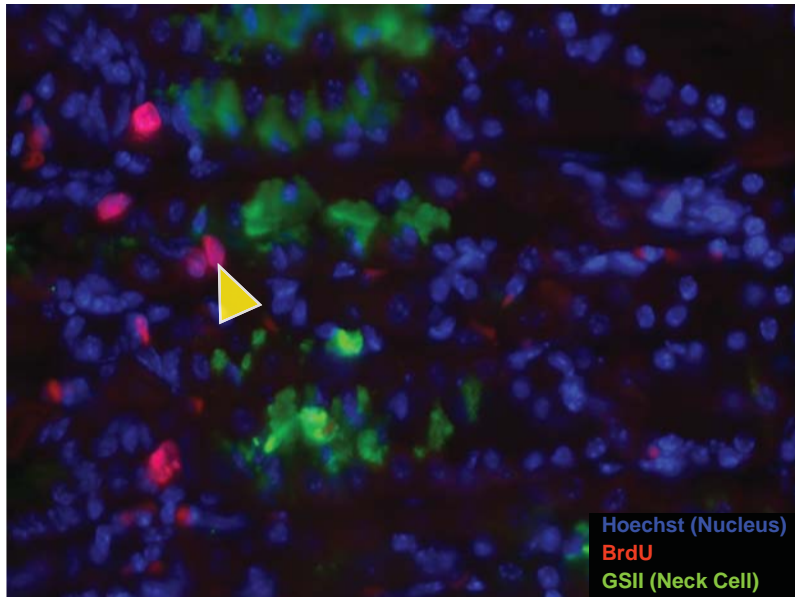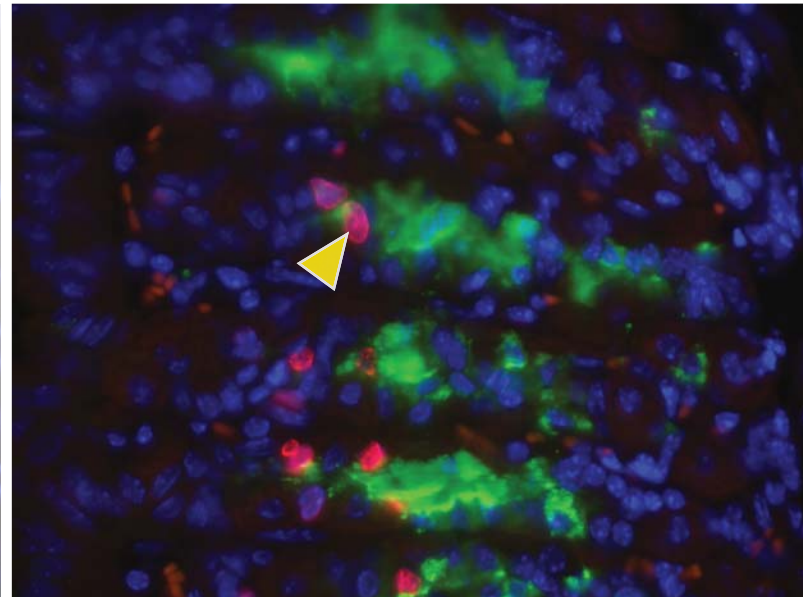

B WT

*Xbp1<sup>Δ</sup>* 14d

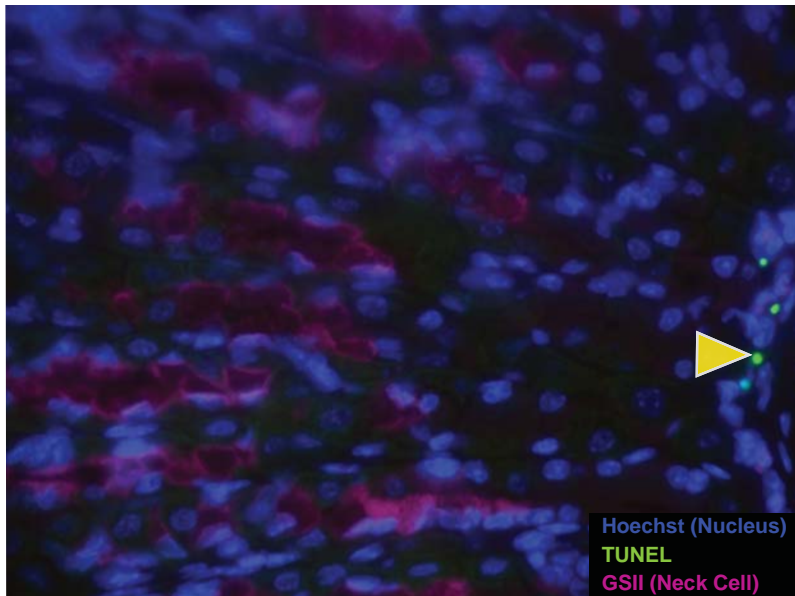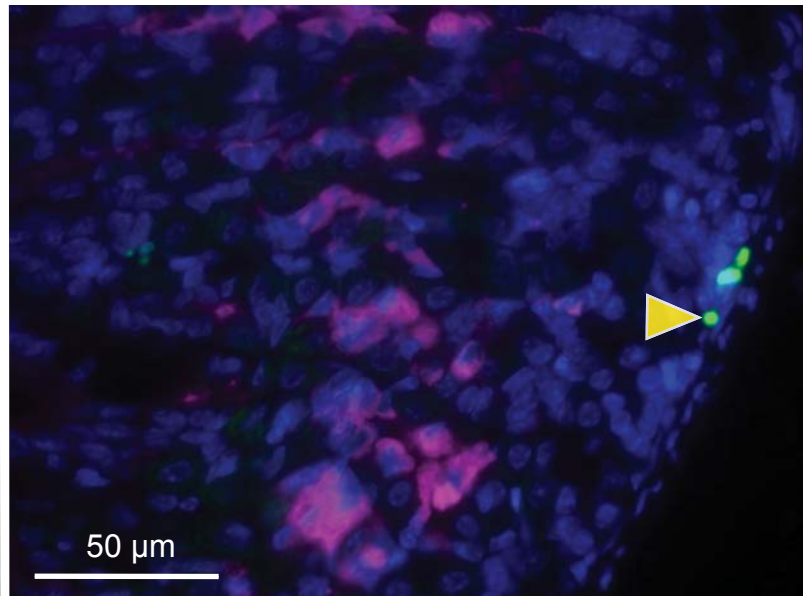

A

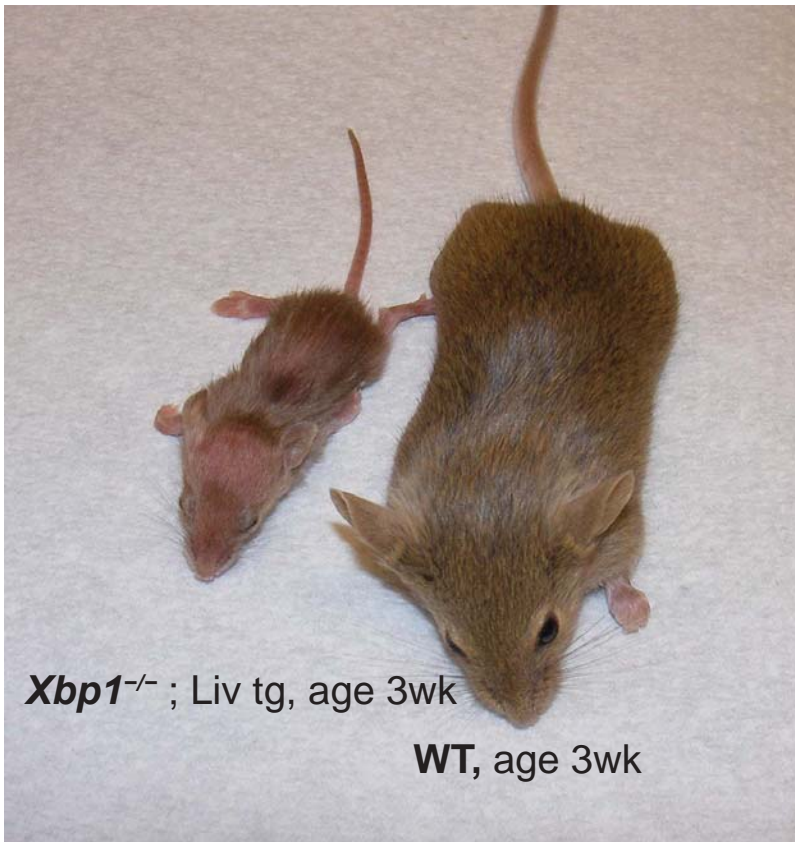

B

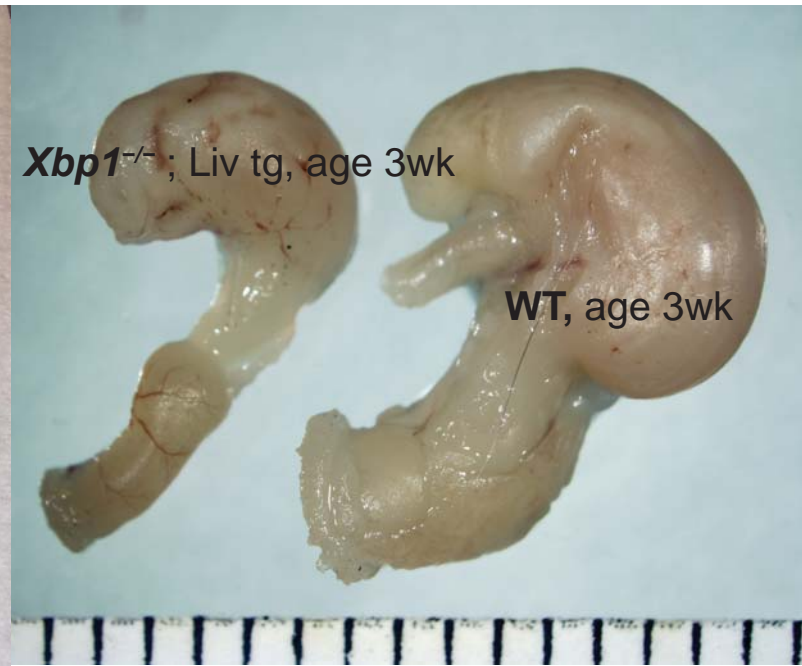

Supplement: NIHMS234229-supplement-01.pdf [file NIHMS234229-supplement-01.pdf]
